1     **Quality Assurance Assessment of Intra-Acquisition Diffusion-Weighted and T2-**  
2     **Weighted Magnetic Resonance Imaging Registration and Contour Propagation for**  
3             **Head and Neck Cancer Radiotherapy**

4  
5             Mohamed A. Naser<sup>a\*</sup>, Kareem A. Wahid<sup>a\*</sup>, Sara Ahmed<sup>a</sup>, Vivian Salama<sup>a</sup>, Cem Dede<sup>a</sup>,  
6             Benjamin W. Edwards<sup>a</sup>, Ruitao Lin<sup>b</sup>, Brigid McDonald<sup>a</sup>, Travis C. Salzillo<sup>a</sup>, Renjie He<sup>a</sup>, Yao  
7             Ding<sup>c</sup>, Moamen Abobakr Abdelaal<sup>a</sup>, Daniel Thill<sup>d</sup>, Nicolette O’Connell<sup>d</sup>, Virgil Willcut<sup>d</sup>, John P.  
8             Christodouleas<sup>d</sup>, Stephen Y Lai<sup>e</sup>, Clifton D. Fuller<sup>a\*\*</sup>, Abdallah S. R. Mohamed<sup>a\*\*</sup>

9  
10     <sup>a</sup>Department of Radiation Oncology, The University of Texas MD Anderson Cancer Center,  
11     Houston, Texas, USA.

12     <sup>b</sup>Department, of Biostatistics, The University of Texas MD Anderson Cancer Center, Houston,  
13     Texas, USA.

14     <sup>c</sup>Department, of Radiation Physics, The University of Texas MD Anderson Cancer Center,  
15     Houston, Texas, USA.

16     <sup>d</sup>Elekta AB, Stockholm, Sweden.

17     <sup>e</sup>Department of Head and Neck Surgery, The University of Texas MD Anderson Cancer Center,  
18     Houston, Texas, USA.

19     \*co-first authors.

20     \*\*co-corresponding authors.

21     Corresponding authors: Clifton D. Fuller. Department of Radiation Oncology, The University of  
22     Texas MD Anderson Cancer Center, Houston, Texas, USA. Email: [cdfuller@mdanderson.org](mailto:cdfuller@mdanderson.org).  
23     Phone number: 713-745-4404. Abdallah S.R. Mohamed. Department of Radiation Oncology,  
24     The University of Texas MD Anderson Cancer Center, Houston, Texas, USA. Email:  
25     [asmohamed@mdanderson.org](mailto:asmohamed@mdanderson.org). Phone number: 713-745-4092. Postal Address: The University  
26     of Texas MD Anderson Cancer Center, 1515 Holcombe Blvd, Houston, TX, 77030, USA.

27

28

29 **Abstract:**

30 *Background/Purpose:* Adequate image registration of anatomic and functional MRI scans is  
31 necessary for MR-guided head and neck cancer (HNC) adaptive radiotherapy planning. Despite  
32 the quantitative capabilities of diffusion-weighted imaging (DWI) MRI for treatment plan  
33 adaptation, geometric distortion remains a considerable limitation. Therefore, we systematically  
34 investigated various deformable image registration (DIR) methods to co-register DWI and T2-  
35 weighted (T2W) images.

36  
37 *Materials/Methods:* We compared three commercial (ADMIRE, Velocity, Raystation) and three  
38 open-source (Elastix with default settings [Elastix Default], Elastix with parameter set 23 [Elastix  
39 23], Demons) post-acquisition DIR methods applied to T2W and DWI MRI images acquired  
40 during the same imaging session in twenty immobilized HNC patients. In addition, we used the  
41 non-registered images (None) as a control comparator. Ground truth segmentations of  
42 radiotherapy structures (tumor and organs at risk) were generated by a physician expert on both  
43 image sequences. For each registration approach, structures were propagated from T2W to  
44 DWI images. These propagated structures were then compared with ground truth DWI  
45 structures using the Dice similarity coefficient and mean surface distance.

46  
47 *Results:* 19 left submandibular glands, 18 right submandibular glands, 20 left parotid glands, 20  
48 right parotid glands, 20 spinal cords, and 12 tumors were delineated. Most DIR methods took <  
49 30 seconds to execute per case, with the exception of Elastix 23 which took ~458 seconds to  
50 execute per case. ADMIRE and Elastix 23 demonstrated improved performance over None for all  
51 metrics and structures (Bonferroni-corrected  $p < 0.05$ ), while the other methods did not. Moreover,  
52 ADMIRE and Elastix 23 significantly improved performance in individual and pooled analysis  
53 compared to all other methods.

54

55 *Conclusions:* The ADMIRE DIR method offers improved geometric performance with reasonable  
56 execution time so should be favored for registering T2W and DWI images acquired during the  
57 same scan session in HNC patients. These results are important to ensure the appropriate  
58 selection of registration strategies for MR-guided radiotherapy.

59

60 **Keywords:** deformable image registration, magnetic resonance, adaptive radiotherapy, quality  
61 assurance.

62

63 **Abbreviations:** T2-weighted (T2W), diffusion-weighted imaging (DWI), Radiation therapy (RT),  
64 head and neck cancer (HNC), organs at risk (OAR), deformable image registration (DIR).

65

## 66 **1. Introduction:**

67 Radiation therapy (RT) is an essential treatment modality for head and neck cancer (HNC) <sup>1</sup>.  
68 Conventionally, RT has relied on radiographic images to enable pre-treatment segmentation of  
69 target volumes and nearby organs at risk (OAR) to plan intensity-modulated doses <sup>2,3</sup>. However,  
70 throughout RT, the dynamic changes in target volumes and OARs and patient-specific changes  
71 (e.g., weight loss) can lead to unintended doses of radiation to OARs and subsequent  
72 debilitating side effects <sup>4</sup>. These potential unintended doses are particularly relevant for HNC  
73 because the head and neck region is home to various complex, highly radiosensitive structures  
74 and tissue interfaces that can drastically change during RT <sup>4,5</sup>.

75

76 Image-guided RT, during which radiation dose can be administered in tandem with onboard  
77 imaging, has become a promising alternative to intensity-modulated RT, in part due to  
78 increasingly ubiquitous image-guided technology, such as MR-Linac devices <sup>6,7</sup>. MR-guided  
79 treatment also affords the ability to capture distinct patient anatomy with varying contrasts via

80 weighted sequence acquisitions, such as T2-weighted (T2W) images, and functional  
81 information, such as through diffusion-weighted imaging (DWI). DWI has shown particular  
82 benefit in aiding treatment adaptation through improved detection of target volumes and  
83 assessment of treatment response<sup>8</sup>. Therefore, combined T2W and DWI acquisition enable the  
84 gathering of anatomic and functional information that can be used for adaptive MR-guided  
85 personalized RT.

86  
87 Anatomical and functional sequences acquired in the same imaging session for MR-guided  
88 treatment often have minimal variation in patient position and geometry between sequence  
89 acquisitions, often due to careful patient immobilization<sup>9</sup>. However, these multisequence  
90 acquisitions can be misaligned by motion artifacts from respiration or swallowing<sup>4</sup>, susceptibility  
91 artifacts, chemical shift artifacts, ghosting artifacts<sup>8</sup>, and geometric distortions<sup>10</sup>. Post-  
92 acquisition image registration, the process by which homologous image voxels from multi-  
93 temporal or multi-modal image sets are mapped to each other<sup>11,12</sup>, is an important approach to  
94 align anatomical and functional sequences. Rigid image registration involves global matching  
95 between image sets, while deformable image registration (DIR) uses optimization algorithms to  
96 adjust image transformation models. Most implementations of DIR involve a transformation that  
97 establishes a geometric correspondence between fixed and moving images, an objective  
98 function, and an optimization approach to maximize the similarity between images<sup>13-15</sup>.

99 Importantly, even minor differences in patient anatomy can result in devastating dose  
100 administration in HNC<sup>4,16</sup>, highlighting the need for consistent image co-registration when  
101 propagating segmentations of target volumes and OARs for radiotherapy treatment planning.  
102 Therefore, determining the impact of post-acquisition registration techniques (i.e., DIR) on  
103 multisequence MRI acquisitions is crucial for MR-guided treatment of HNC.

104

105 While we have previously investigated intra-modality CT to CT registration <sup>17</sup> and inter-modality  
106 CT to MRI registration <sup>18</sup>, to our knowledge, there are no studies that investigate registration  
107 techniques for intra-acquisition MRI in HNC. Therefore, to facilitate further development and  
108 optimization of MR-guided RT adaptive planning technologies, we systematically analyzed DIR  
109 methods in T2W and DWI MRI sequences acquired during the same imaging session.

110

## 111 **2. Methods:**

112 We developed a quality assurance workflow for evaluating and benchmarking the performance  
113 of different image registration methods for T2W and DWI images (described in subsection 2.2)  
114 of 20 HNC patients (2.1). We evaluated different DIR methods provided by the commercial RT  
115 treatment planning software, as well as open-source DIR implementations (2.3). The  
116 deformation vector field (DVF) generated by each method was used to propagate the manually  
117 segmented structures (2.2) from T2W to DWI images. The structures propagated by different  
118 methods to DWI images were compared to the ground truth segmentations for performance  
119 evaluation (2.4).

120

121 *2.1. Patient Characteristics:* Twenty patients with HNC who had undergone RT in a clinical trial  
122 (NCT03145077) were included in this analysis. All clinical and imaging data were generated  
123 between May 30, 2017 and April 1, 2019 and were retrospectively collected under a HIPAA-  
124 compliant protocol (PA16-0302) that was approved by The University of Texas MD Anderson  
125 Cancer Center's institutional review board. All patients provided study-specific informed  
126 consent. The median patient age was 54 years, with a male predominance (80%). Primary  
127 tumor sites included the oropharynx, nasopharynx, and oral cavity. Full patient clinical and  
128 demographic characteristics are summarized in **Table 1**.

129 **Table 1.** Patient clinical and demographic characteristics.

| Characteristic      | Value      |
|---------------------|------------|
| Age (median, range) | 54 (32-77) |
| Sex                 |            |
| Male                | 16         |
| Female              | 4          |
| Race                |            |
| Asian               | 1          |
| White/Caucasian     | 19         |
| Tumor subsite       |            |
| Base of tongue      | 10         |
| Tonsil              | 5          |
| Buccal mucosa       | 1          |
| Floor of mouth      | 1          |
| Nasal cavity        | 1          |
| Nasopharynx         | 1          |
| Unknown             | 1          |
| T-category          |            |
| T0                  | 1          |
| T1                  | 5          |
| T2                  | 7          |
| T3                  | 2          |
| T4                  | 5          |
| N-category          |            |
| Nx                  | 1          |
| N1                  | 11         |
| N2a                 | 1          |
| N2b                 | 6          |
| N2c                 | 1          |
| AJCC stage          |            |
| I                   | 2          |
| II                  | 6          |
| III                 | 2          |
| IVA                 | 9          |
| IVB                 | 1          |

130 Unless otherwise indicated, data shown correspond to patient number counts. AJCC, American

131 Joint Committee on Cancer.

132

133 *2.2. Imaging Data:* Pre-RT T2W and DWI MRI sequences in Digital Imaging and

134 Communications in Medicine (DICOM) format for each of the 20 patients were curated from our

135 imaging databases. T2W images and DWI images with a b value of 0 were collected in the

136 same imaging session while the patient was immobilized in a thermoplastic mask using a 1.5

137 Tesla Siemens MRI simulator. Characteristics of the imaging sequences are shown in **Table 2**.  
138 For each image set (T2W image and DWI image), ground truth segmentations for the left and  
139 right submandibular glands, left and right parotid glands, cervical spinal cord, and primary gross  
140 tumor volume were manually generated by a trained physician expert (radiologist with > 5 years  
141 of experience in HNC). All segmentations were generated in Velocity AI (v.3.0.1; Varian Medical  
142 Systems; Palo Alto, CA, USA) in DICOM RT structure format. The anonymized image sets and  
143 structure files are publicly available online through Figshare (10.6084/m9.figshare.17162435,  
144 under embargo until manuscript acceptance).

145

146 **Table 2.** MRI sequence acquisition parameters. Median value displayed with range of values  
147 shown in parenthesis. No parenthesis indicates all values were the same for all patients.

| Acquisition Parameter    | T2W           | DWI              |
|--------------------------|---------------|------------------|
| Repetition time (ms)     | 4800          | 5000 (1500-7000) |
| Echo time (ms)           | 80            | 65 (50-102)      |
| Echo train length        | 15            | 15 (0-63)        |
| Flip angle (°)           | 180 (166-180) | 120 (90-180)     |
| Slice thickness (mm)     | 2             | 4                |
| In-plane resolution (mm) | 0.5           | 2.0 (1.0-2.0)    |
| Slice gap (mm)           | 2             | 4                |
| Acquisition matrix       | 256x230       | 128x128          |
| Pixel bandwidth (Hz/px)  | 300           | 870 (750-1220)   |
| Number of averages       | 1             | 2                |
| Number of axial slices   | 120           | 28 (24-48)       |

148 T2W, T2-weighted magnetic resonance imaging; DWI, diffusion-weighted magnetic resonance  
149 imaging.

150

151 **2.3. Image Registration:** For this analysis, we investigated several DIR registration methods  
152 from different commercial radiotherapy software packages and open-source implementations.  
153 Specifically, the following DIR methods were utilized:

- 154 1. ADMIRE: A proprietary approach from the commercial software package ADMIRE (v.3.29;  
155 Elekta AB; Stockholm, Sweden) that implements an atlas-based approach with head pose  
156 correction, dense mutual-information, and refinement using a deformable surface model.
- 157 2. Velocity: A proprietary approach from the commercial software package Velocity AI (v.3.0.1;  
158 Varian Medical Systems; Palo Alto, CA, USA) that implements a 3-pass (coarse-medium-fine  
159 resolution) modified B-spline.
- 160 3. Elastix Default: An open-source approach from the popular medical image registration library  
161 Elastix (SimpleElastix Python interface <sup>19</sup>) that utilizes a multi-resolution B-spline (default  
162 parameter map). Specifically, the algorithm uses an adaptive stochastic gradient descent  
163 optimizer, linear interpolator, FixedImagePyramidSchedule = 8 8 8 4 4 4 2 2 2 1 1 1,  
164 MovingImagePyramidSchedule = 8 8 8 4 4 4 2 2 2 1 1 1, number of resolutions = 4, and 4096  
165 spatial samples. More information on the algorithm can be found in the Elastix documentation <sup>20</sup>.
- 166 4. Elastix 23: An open-source approach from the popular medical image registration library  
167 Elastix (SimpleElastix Python interface <sup>19</sup>) that utilizes localized mutual information combined  
168 with a bending energy penalty in a B-spline transformation (referred to as parameter map 23 in  
169 the Elastix Zoo) <sup>21</sup>. Specifically, the algorithm uses an adaptive stochastic gradient descent  
170 optimizer, B-spline interpolator, Image Pyramid Schedule = 8 8 2 4 4 1 1 1 0.5, number of  
171 resolutions = 3, and 10000 spatial samples. This algorithm was selected because it was  
172 explicitly developed for multi-modality head and neck registration. More information on the  
173 algorithm can be found in the Elastix documentation <sup>20</sup>.
- 174 5. Demons: An open-source approach based on the Demons <sup>22</sup> family of algorithms available in  
175 SimpleITK <sup>23</sup>. Specifically, the algorithm uses a multi-resolution framework with shrink factors of  
176 [4,2,1] and smoothing sigmas of [8,4,0], a linear interpolator, and a gradient descent optimizer



177 (learning rate = 1.0, number of iterations =20, convergence minimum value =  $1e^{-6}$ , convergence  
178 window size = 10).

179 6. Raystation: A proprietary approach from the commercial software package RayStation  
180 Research (RaySearch Laboratories, Stockholm, Sweden) that implements a modified  
181 ANAtomically CONstrained Deformation Algorithm <sup>24</sup> using only intensity-based registration.

182

183 For all cases, the DWI image was used as the fixed image, and the T2W image was used as the  
184 moving image; T2W images were resampled to the DWI image. To maintain adequate  
185 comparisons between structures generated on T2W images and DWI images, before  
186 registration all structures were cropped to the image with the smaller field of view, e.g., DWI  
187 image. For additional deformable vector field (DVF) visualization and analysis, Jacobian  
188 determinant matrices were derived from DVF files of each method using SimpleITK or as direct  
189 output from ADMIRE. As a control comparator for all cases, we also analyzed the raw images  
190 with no post-acquisition registration applied, i.e., an implicit rigid registration as a byproduct of  
191 patient immobilization (labeled as “None”). After the registration process, for each method, we  
192 propagated the ground truth segmentations from the T2W images to the DWI images using the  
193 corresponding transformations to generate propagated structures (**Figure 1A-H**). These  
194 propagated structures were then compared to the ground truth structures on the DWI image in  
195 the subsequent analysis. Before the analysis, all images and structure files were transformed  
196 into Neuroimaging Informatics Technology Initiative format. Finally, because there were small  
197 variations in the inferior and superior slices of the cervical spinal cord, we cropped these  
198 structures so that the heights of the propagated segmentation and ground truth segmentation  
199 were equal (**Figure 1I**).

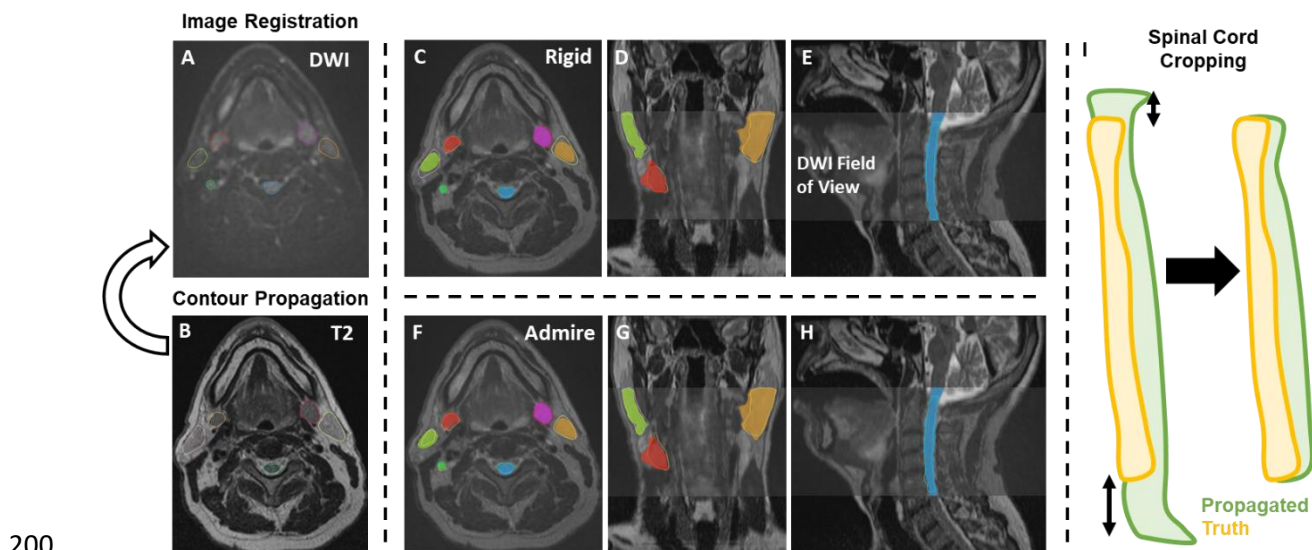

200

201 **Figure 1.** Study workflow. Contours are propagated from the moving image (B, T2-weighted  
202 image [T2]) to the fixed image (A, diffusion-weighted image [DWI]) for each registration method.  
203 C-E and F-H show propagated and ground truth structures for the implicit rigid and ADMIRE  
204 approaches, respectively. The spinal cord was also cropped so that the height of the  
205 propagated segmentation and ground truth segmentation were equal (I).

206

207 *2.4. Statistical Analysis:* Several evaluation metrics were used to compare the propagated  
208 structure sets after registration to the ground truth structures delineated on the DWI images.  
209 Specifically, for each individual structure, the Dice similarity coefficient (DSC) and mean surface  
210 distance (MSD) were calculated as they are well-established and ubiquitous metrics for  
211 measuring volumetric and surface distance information, respectively<sup>25</sup>. Additional volumetric  
212 and surface distance metrics were calculated for supplementary analyses (**Appendix A**).  
213 Metrics were calculated using the surface-distance Python package<sup>26</sup> and in-house Python  
214 code. After performing a Shapiro-Wilk test<sup>27</sup>, we found that our data were not normally  
215 distributed ( $p < 0.05$ ). Therefore, we used nonparametric statistical tests for our analysis. For  
216 each metric and each structure, we compared registration methods against 'None' using one-

217 sided Wilcoxon signed-rank tests (alternative hypothesis of greater than the null hypothesis for  
218 DSC and alternative hypothesis of less than the null hypothesis for MSD) with Bonferroni  
219 adjustments for multiple comparisons<sup>28</sup>. Similarly, we pooled metrics for OARs for sub-analysis  
220 and performed pair-wise analysis using previously described Wilcoxon signed-rank tests with  
221 Bonferroni corrections. Interobserver variability, dosimetric, target registration error (TRE) for a  
222 subset of 5 patients, and DVF Jacobian matrix analysis were performed in **Appendix B**,  
223 **Appendix C**, **Appendix D**, and **Appendix E**, respectively. For all statistical analyses, p-values  
224 less than 0.05 were considered significant. All statistical analyses were performed in Python  
225 v.3.7<sup>29</sup>.

226

### 227 **3. Results:**

228 *3.1. Quantitative Comparison:* 19 left submandibular glands, 18 right submandibular glands, 20  
229 left parotid glands, 20 right parotid glands, 20 cervical spinal cords, and 12 primary tumors in  
230 both T2W and DWI images were used in the analysis. ADMIRE, Velocity, Elastix Default, Elastix  
231 23, Demons, and Raystation each took approximately 23, 7, 46, 458, 4, and 13 seconds to  
232 complete one case, respectively. For each method, most OAR structures had similar  
233 performance across the multiple metrics except for the cervical spinal cord which was notably  
234 worse (**Figure 2**); we therefore performed additional analysis to investigate spinal cord  
235 structures in individual cases in **Appendix F**. Compared to the structures generated by no  
236 registration (“None”), all structures demonstrated an improvement with the ADMIRE and Elastix  
237 23 methods, and worsened with all other methods (**Figure 2**). Specifically, the ADMIRE and  
238 Elastix 23 methods showed significant improvements ( $p < 0.05$  on one sided Wilcoxon signed  
239 rank test) for both DSC and MSD metrics for all structures (**Figure 3**). When metrics were  
240 pooled across structures, similar trends emerged where the ADMIRE and Elastix 23 methods  
241 demonstrated the best performance compared to the other methods, with DSC gains over None

242 of up to .05 and .07, respectively in the OARs, and up to .08 and .09, respectively, in the tumor  
243 (Table 3). Moreover, pair-wise comparisons of pooled OAR structures and the tumor  
244 demonstrated that Elastix 23 offered significantly improved performance over ADMIRE ( $p < 0.05$ ),  
245 and that Elastix Default, Demons, and Raystation were consistently outperformed by the other  
246 methods (Figure 4). Dosimetric (Appendix C) and TRE (Appendix D) analysis revealed no  
247 significant improvements of any DIR methods compared to None.

248

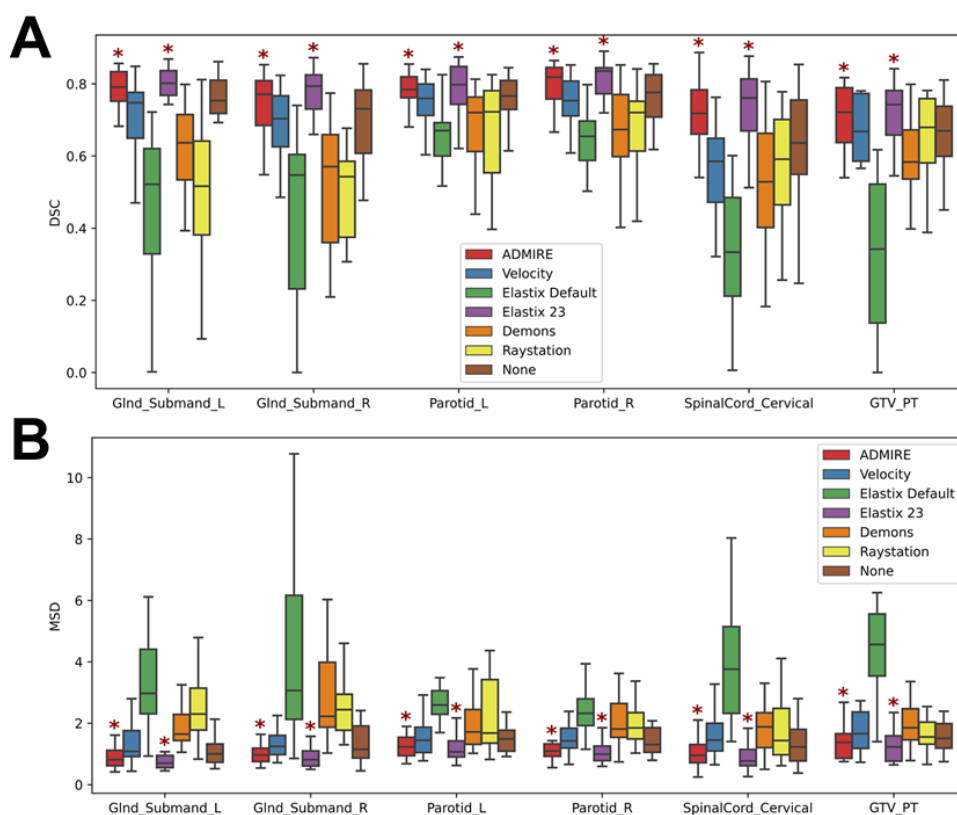

249

250 **Figure 2.** Box plots of evaluation metrics for each structure according to the registration method  
251 for Dice similarity coefficient (DSC) [A] and mean surface distance (MSD) [B]. Asterisks indicate  
252 a significant improvement between the registration method and no registration (None).

253 GlnD\_Submand, submandibular gland; L, left; R, right; GTV\_PT, primary gross tumor volume.

254

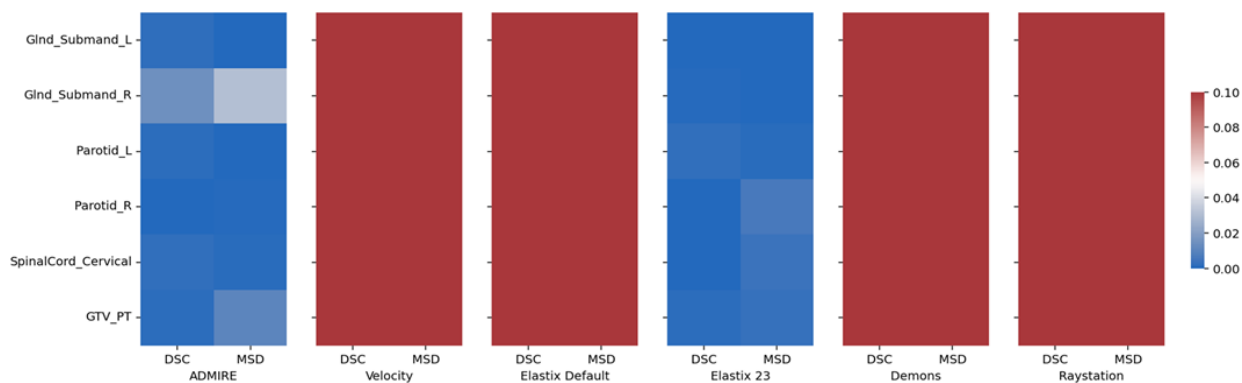

255

256 **Figure 3.** Heatmap of Bonferroni corrected p-values for one-way Wilcoxon-signed rank tests  
 257 between various registration methods and no registration (None) indicating significant  
 258 improvement across evaluation metrics and structures. Blue colors correspond to significant p-  
 259 values ( $p < 0.05$ ) while red colors correspond to non-significant values ( $p > 0.05$ ). GlnD\_Submand,  
 260 submandibular gland; L, left; R, right; GTV\_PT, primary gross tumor volume; DSC, Dice  
 261 similarity coefficient; MSD, mean surface distance.

262

263 **Table 3.** Evaluation metrics (mean  $\pm$  standard deviation) across pooled structures according to  
 264 each registration method. DSC, Dice similarity coefficient; MSD, mean surface distance.

|       | Metric   | ADMIRE          | Velocity        | Elastix Default | Elastix 23      | Demons          | Raystation      | None            |
|-------|----------|-----------------|-----------------|-----------------|-----------------|-----------------|-----------------|-----------------|
| OARs  | DSC      | 0.76 $\pm$ 0.09 | 0.67 $\pm$ 0.16 | 0.51 $\pm$ 0.21 | 0.78 $\pm$ 0.08 | 0.60 $\pm$ 0.16 | 0.58 $\pm$ 0.18 | 0.71 $\pm$ 0.13 |
|       | MSD (mm) | 1.12 $\pm$ 0.51 | 1.68 $\pm$ 1.25 | 3.68 $\pm$ 2.92 | 1.01 $\pm$ 0.49 | 2.19 $\pm$ 1.16 | 2.39 $\pm$ 1.92 | 1.46 $\pm$ 0.92 |
| Tumor | DSC      | 0.70 $\pm$ 0.09 | 0.59 $\pm$ 0.25 | 0.33 $\pm$ 0.20 | 0.71 $\pm$ 0.09 | 0.60 $\pm$ 0.12 | 0.63 $\pm$ 0.16 | 0.62 $\pm$ 0.21 |
|       | MSD (mm) | 1.38 $\pm$ 0.55 | 3.63 $\pm$ 6.62 | 5.49 $\pm$ 3.59 | 1.25 $\pm$ 0.52 | 2.00 $\pm$ 0.82 | 1.88 $\pm$ 1.03 | 2.64 $\pm$ 3.56 |

265 OARs, organs at risk; DSC, Dice similarity coefficient; MSD, mean surface distance.

266

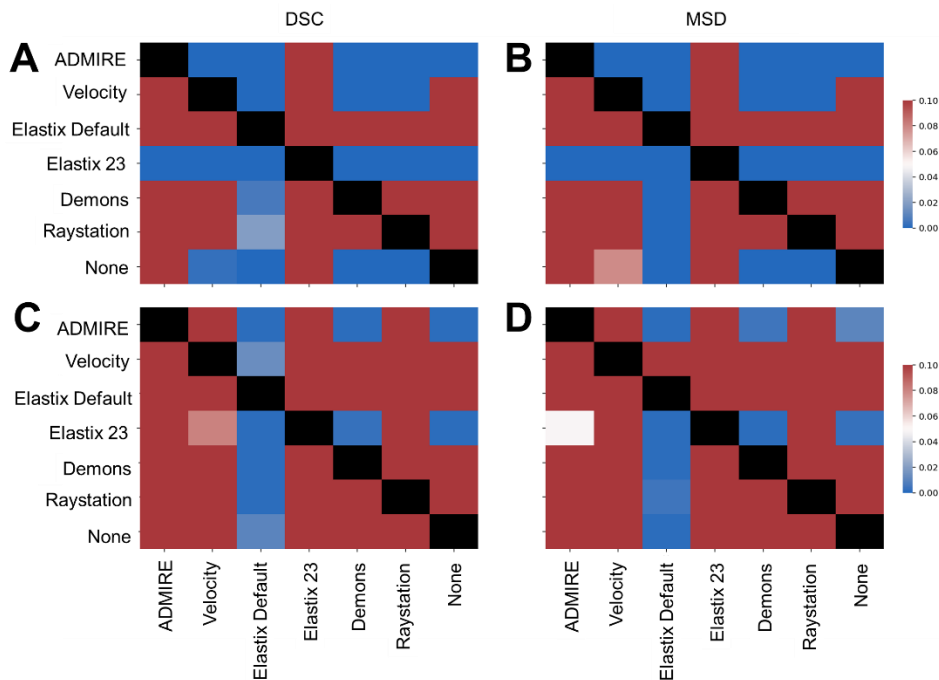

267

268 **Figure 4.** Heatmap of Bonferroni corrected p-values for one-way Wilcoxon-signed rank tests for  
 269 pair-wise comparisons between various registration methods indicating significant improvement  
 270 of method in row vs. method in column. Top plots correspond to all pooled organ at risk  
 271 structures using Dice Similarity Coefficient (DSC) (A) and mean surface distance (MSD) (B).  
 272 Bottom plots correspond to tumor using DSC (C) and MSD (D). Blue colors correspond to  
 273 significant p-values ( $p < 0.05$ ) while red colors correspond to non-significant values ( $p > 0.05$ ).  
 274 Comparisons between the same method (diagonal entries) are blacked out.

275

276 **3.2. Qualitative Comparison:** We visually compared the deformed T2W images of the various  
 277 DIR methods and their corresponding Jacobian determinant matrices in **Figure 5**. Generally,  
 278 most methods often yielded visually similar deformed image outputs as the ground-truth T2W  
 279 image. However, large deviations in DVF warping could sometimes be observed for Velocity  
 280 and Elastix Default. Additional quantitative analysis of Jacobian determinants for the various  
 281 methods can be found in **Appendix E**.

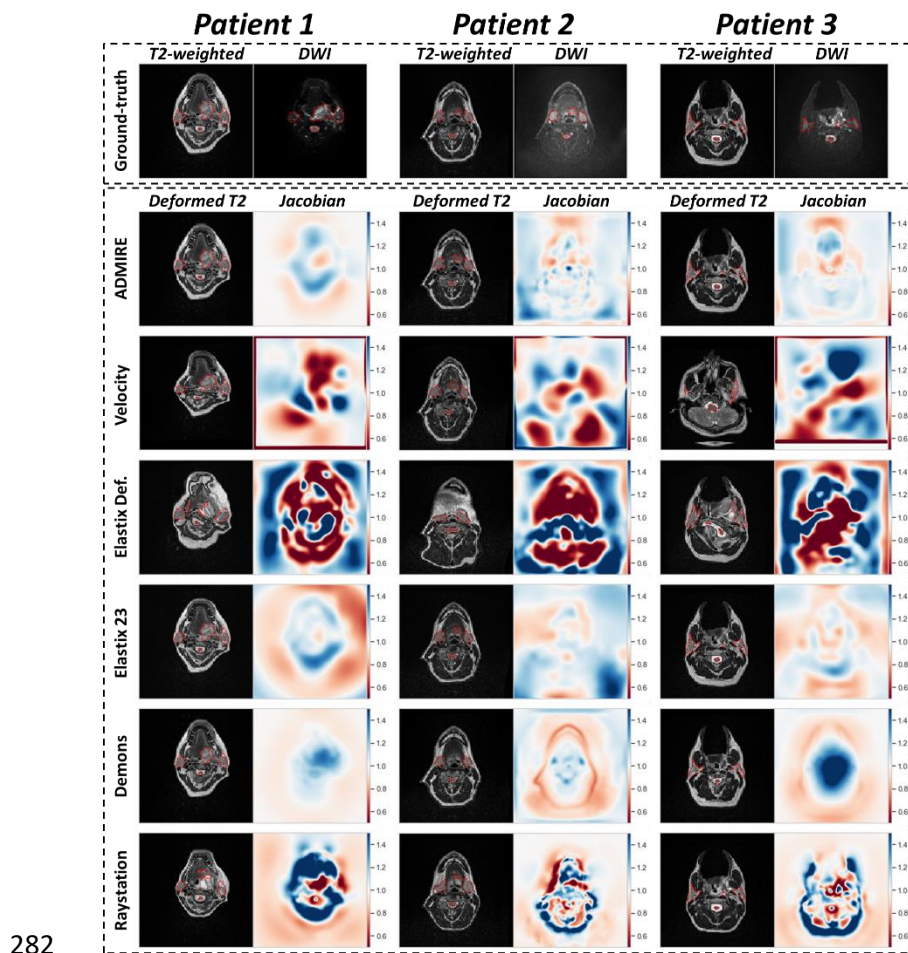

283 **Figure 5.** Visualization of deformable image registration method outputs for 3 example patients.

284 The top row shows original T2-weighted image and diffusion weighted image (DWI) with

285 ground-truth segmentations overlaid (red dotted outline). The deformed T2-weighted image with

286 overlaid propagated segmentation (red dotted outline) and corresponding Jacobian determinant

287 is shown for each image registration method. Jacobian determinants greater than 1 indicate

288 volume expansion, between 0 and 1 indicate volume reduction, and equal to 1 indicates no

289 change.

290

#### 291 4. Discussion



292 In this study, we systematically analyzed a variety of DIR methods and compared them to non-  
293 registered images from multisequence MRI acquisitions for HNC image-guided treatment  
294 applications. Our results highlight that specific DIR methods can improve upon pre-established  
295 head and neck immobilization, as shown by measuring the similarity of propagated ground truth  
296 segmentations from T2W images to DWI images compared to ground truth segmentations on  
297 DWI images (**Figures 2 and 3**).

298

299 The best overall results were obtained using ADMIRE and Elastix 23 (**Table 3**), with all metric  
300 and structure combinations having significantly better performance than None (**Figure 3**). While  
301 we tested other deformable methods (i.e., Velocity, Demons, Elastix Default, and Raystation),  
302 they were significantly worse for most metric and structure combinations when compared to the  
303 None. Moreover, Velocity and Elastix Default sometimes yielded implausible DVFs, as indicated  
304 by qualitative and quantitative analysis of Jacobian determinants (**Figure 4, Appendix E**), which  
305 may be due to these DIR algorithmic implementations being unable to accommodate large  
306 variations in intensity domains of the T2W and DWI images. Importantly, almost all structures  
307 individually and on pooled analysis showed improved DSC and MSD for the ADMIRE and  
308 Elastix 23 methods (**Table 3**). These results indicate that these methods provide significantly  
309 improved volumetric and surface distance overlap, which may warrant their use during intra-  
310 acquisition MRI sequences for MR-guided treatment. Moreover, while dosimetrically there were  
311 no significant improvements for any structures for ADMIRE and Elastix 23 compared to None  
312 (**Appendix C**), these differences may still be clinically significant. Similarly, for TRE analysis on  
313 a subset of methods, ADMIRE often offered decreased registration error compared to no  
314 registration (**Appendix D**), but was nonsignificant, likely secondary to the already minimal  
315 registration errors induced through the use of an immobilization mask. Notably, Elastix 23  
316 provided significantly improved volumetric and surface distance performance compared to



317 ADMIRE. However, these improvements may not be clinically significant (DSC gains of ~1%)  
318 and come at the cost of a much longer execution time (~7 minutes longer), therefore, ADMIRE  
319 should likely be preferred for workflows where time is a limiting factor, i.e., adaptive  
320 radiotherapy. It is also worth noting the spinal cord is especially sensitive to distortion-causing  
321 artifacts<sup>30</sup>, making it a particularly challenging structure to co-register adequately. While the  
322 general performance for the spinal cord was lower than that of other OAR structures, the  
323 ADMIRE based methods were still able to offer significantly improved performance compared to  
324 the implicit rigid registration (**Figures 2 and 3**); cases with lower performance tended to have a  
325 larger degree of spinal curvature than cases with higher performance (**Appendix F**). Therefore,  
326 while the ADMIRE method should still be preferred over no registration, special caution should  
327 be used in quality assurance when used for spinal cord segmentations. Notably, all estimated  
328 metrics between any registration method and None showed no significant differences using  
329 segmentations generated by different observers (**Appendix B**), indicating that our data are not  
330 confounded by interobserver variability.

331  
332 While several previous studies have investigated the relative performance of registration  
333 methods in various anatomical sites<sup>31–33</sup>, there is a general lack of investigations of head and  
334 neck imaging. However, a few recent important studies have investigated registration quality  
335 assessment in head and neck imaging using radiotherapy structure analysis similar to our  
336 current study<sup>17,18</sup>. For example, Mohamed et al.<sup>17</sup> investigated the registration quality of  
337 diagnostic CT to simulation CT in HNC where images were acquired at different time points and  
338 with different scan settings and found that certain DIR methods demonstrated improved  
339 performance over a control group (rigid registration) for OAR and target conformance for most  
340 comparison metrics, similar to our study. Oppositely, Kiser et al.<sup>18</sup> showed that for CT and T2W  
341 MRI scans acquired with standard treatment immobilization techniques, MRI to CT DIR was not

342 superior to rigid registration, with neither technique producing clinically satisfactory results  
343 (DSCs of 0.62 - 0.65). Importantly, the ADMIRE method investigated in our study produce  
344 potentially clinically meaningful results as we observe significant performance gains across  
345 various structures that may impact MR-guided treatments with a reasonable execution time.

346  
347 To date, no systematic anatomical to functional MRI registration studies have been performed  
348 for HNC. However, intra-acquisition MRI registration techniques have been investigated in other  
349 anatomical sites. Specifically, several studies have compared registration techniques for various  
350 MRI sequences in the prostate<sup>34–36</sup>. For example, Buerger et al. compared the performance of  
351 five state-of-the-art DIR image registration techniques for accurate image fusion of DWI with  
352 T2W images and found fast elastic image registration provided improved performance  
353 compared to other deformable techniques such as B-spline and Demons<sup>35</sup>. This result was  
354 further echoed in Eriksson et al., which confirmed that fast elastic image registration was the  
355 best technique for T1-weighted to T2W anatomic sequence registration<sup>36</sup>. Our results are  
356 consistent with these observations that selecting appropriate deformable techniques offers  
357 significantly improved performance for intra-acquisition registration.

358  
359 There are several limitations to our study. We limited our analysis of intra-acquisition registration  
360 techniques in MRI to T2W and DWI sequences since these are the most germane to current  
361 MR-guided RT applications. However, several additional sequences can be studied to  
362 investigate these phenomena. In this study, we only tested b0 images, which were readily  
363 available and common for DWI workflows in HNC. Moreover, as no images suffered from major  
364 geometric distortion, we did not address geometric distortion in this study. Future iterations of  
365 this study should investigate other DWI-derived images and the influence of geometric distortion  
366 on DIR. Notably, we have found dosimetric improvements for certain DIR methods (though non-

367 significant), but the clinical significance of these improvements is unknown and should be  
368 confirmed through additional experiments such as normal tissue complication probability  
369 calculations. Additionally, we have limited our investigation to a few critical RT HNC structures  
370 of interest using one expert observer; future studies should investigate a greater number of  
371 structures in a greater number of patients with a larger number of observers. It should also be  
372 noted that while most contoured structures were not expected to vary considerably between T2  
373 and DWI, pathologic structures may be interpreted differently on these images, thus caution  
374 should be used when interpreting results for the tumor. Finally, we have limited our analysis to  
375 intra-acquisition images collected during the same image acquisition session. However, for MR-  
376 guided RT applications, registration techniques are also relevant for images taken at different  
377 time points. Therefore, future studies should investigate these registration techniques applied to  
378 different imaging time points in an MR-guided RT workflow.

379

## 380 **5. Conclusions**

381 In summary, this is the first study to investigate intra-acquisition MRI registration quality in HNC  
382 patients. We identify a deformable registration technique from the ADMIRE software package  
383 that offers the most significant gains in registration quality with reasonable execution time for  
384 T2W to DWI image registration compared to other methods. Our results are a crucial first step  
385 towards registration quality assurance for MR-guided treatment approaches that implement  
386 multi-sequence acquisitions combining anatomical and functional imaging.

387

## 388 **Acknowledgments**

389 The authors thank Ann Sutton, Scientific Editor, and Ashli Nguyen-Villarreal, Associate Scientific  
390 Editor, in the Research Medical Library at The University of Texas MD Anderson Cancer  
391 Center, for editing this article. The authors also acknowledge the following people for their

392 contributions to the NIH-funded academic-industrial partnership grant (R01DE028290) that  
393 funded this work and for their general support and feedback regarding this project: Spencer  
394 Marshall, Hafid Akhiat, Michel Moreau, Nathan Cho, Edyta Bubula-Rehm, Chunhua Men, and  
395 Etienne Lessard of Elekta and Alex Dresner of Philips.

396

### 397 **Funding Statement**

398 This work was supported by the National Institutes of Health (NIH) through a Cancer Center  
399 Support Grant (P30-CA016672-44) and an Academic-Industrial Partnership Award (R01  
400 DE028290). K.A. Wahid is supported by the American Legion Auxiliary Fellowship in Cancer  
401 Research, the Dr. John J. Kopchick Fellowship through The University of Texas MD Anderson  
402 UTHealth Graduate School of Biomedical Sciences, and a NIDCR F31 fellowship (1 F31  
403 DE031502-01). B.A. McDonald receives research support from an NIH NIDCR Award  
404 (F31DE029093) and the Dr. John J. Kopchick Fellowship through The University of Texas MD  
405 Anderson UTHealth Graduate School of Biomedical Sciences. T.C. Salzillo is supported by a  
406 training fellowship from The University of Texas Health Science Center at Houston Center for  
407 Clinical and Translational Sciences TL1 Program (TL1TR003169). C.D. Fuller received funding  
408 from an NIH NIDCR Award (1R01 DE025248-01/R56 DE025248) and Academic-Industrial  
409 Partnership Award (R01 DE028290); the National Science Foundation (NSF), Division of  
410 Mathematical Sciences, Joint NIH/NSF Initiative on Quantitative Approaches to Biomedical Big  
411 Data (QuBBD) Grant (NSF 1557679); the NIH Big Data to Knowledge (BD2K) Program of the  
412 National Cancer Institute (NCI) Early Stage Development of Technologies in Biomedical  
413 Computing, Informatics, and Big Data Science Award (1R01 CA214825); the NCI Early Phase  
414 Clinical Trials in Imaging and Image-Guided Interventions Program (1R01 CA218148); the  
415 NIH/NCI Cancer Center Support Grant (CCSG) Pilot Research Program Award from the UT MD  
416 Anderson CCSG Radiation Oncology and Cancer Imaging Program (P30 CA016672); the

417 NIH/NCI Head and Neck Specialized Programs of Research Excellence (SPORE)  
418 Developmental Research Program Award (P50 CA097007); and the National Institute of  
419 Biomedical Imaging and Bioengineering (NIBIB) Research Education Program (R25  
420 EB025787).

421

422 **Conflict of Interest:** C.D.F. has received direct industry grant support, speaking honoraria, and  
423 travel funding from Elekta AB. D.T., N.O., V.W., and J.P.C. are employees of Elekta AB. The  
424 other authors have no conflicts of interest to disclose.

425

## 426 **References**

- 427 1. Koyfman SA, Brizel DM, Posner MR. General principles of radiation therapy for head and  
428 neck cancer. UpToDate; Post, TW, Ed.; UpToDate: Waltham, MA, USA. Published 2018.  
429 Accessed August 20, 2021. [https://www.uptodate.com/contents/general-principles-of-](https://www.uptodate.com/contents/general-principles-of-radiation-therapy-for-head-and-neck-cancer)  
430 [radiation-therapy-for-head-and-neck-cancer](https://www.uptodate.com/contents/general-principles-of-radiation-therapy-for-head-and-neck-cancer)
- 431 2. Bortfeld T. IMRT: a review and preview. *Phys Med Biol.* 2006;51(13):R363.
- 432 3. Marta GN, Silva V, de Andrade Carvalho H, et al. Intensity-modulated radiation therapy  
433 for head and neck cancer: systematic review and meta-analysis. *Radiother Oncol.*  
434 2014;110(1):9-15.
- 435 4. Mali SB. Adaptive radiotherapy for head neck cancer. *J Maxillofac Oral Surg.*  
436 2016;15(4):549-554.
- 437 5. Morgan HE, Sher DJ. Adaptive radiotherapy for head and neck cancer. *Cancers Head*  
438 *Neck.* 2020;5(1):1. doi:10.1186/s41199-019-0046-z

- 439 6. Pollard JM, Wen Z, Sadagopan R, Wang J, Ibbott GS. The future of image-guided  
440 radiotherapy will be MR guided. *Br J Radiol.* 2017;90(1073):20160667.
- 441 7. Choudhury A, Budgell G, MacKay R, et al. The future of image-guided radiotherapy. *Clin*  
442 *Oncol.* 2017;29(10):662-666.
- 443 8. Chawla S, Kim S, Wang S, Poptani H. Diffusion-weighted imaging in head and neck  
444 cancers. *Futur Oncol.* 2009;5(7):959-975.
- 445 9. Mohamed ASR, Hansen C, Weygand J, et al. Prospective analysis of in vivo landmark  
446 point-based MRI geometric distortion in head and neck cancer patients scanned in  
447 immobilized radiation treatment position: Results of a prospective quality assurance  
448 protocol. *Clin Transl Radiat Oncol.* 2017;7:13-19. doi:10.1016/j.ctro.2017.09.003
- 449 10. Weygand J, Fuller CD, Ibbott GS, et al. Spatial precision in magnetic resonance imaging–  
450 guided radiation therapy: the role of geometric distortion. *Int J Radiat Oncol Biol Phys.*  
451 2016;95(4):1304-1316.
- 452 11. Rong Y, Rosu-Bubulac M, Benedict SH, et al. Rigid and Deformable Image Registration  
453 for Radiation Therapy: A Self-Study Evaluation Guide in YYYY Clinical Trial Participation.  
454 *Pract Radiat Oncol.* Published online 2021.
- 455 12. Hill DLG, Batchelor PG, Holden M, Hawkes DJ. Medical image registration. *Phys Med*  
456 *Biol.* 2001;46(3):R1.
- 457 13. Kessler ML. Image registration and data fusion in radiation therapy. *Br J Radiol.*  
458 2006;79(SPEC. ISS.). doi:10.1259/bjr/70617164
- 459 14. Sotiras A, Davatzikos C, Paragios N. Deformable medical image registration: A survey.  
460 *IEEE Trans Med Imaging.* 2013;32(7):1153-1190.
- 461 15. Oliveira FPM, Tavares JMRS. Medical image registration: a review. *Comput Methods*

- 462 *Biomech Biomed Engin.* 2014;17(2):73-93.
- 463 16. Schwartz DL, Garden AS, Shah SJ, et al. Adaptive radiotherapy for head and neck  
464 cancer—dosimetric results from a prospective clinical trial. *Radiother Oncol.*  
465 2013;106(1):80-84.
- 466 17. Mohamed ASR, Ruangskul M-N, Awan MJ, et al. Quality assurance assessment of  
467 diagnostic and radiation therapy—simulation CT image registration for head and neck  
468 radiation therapy: anatomic region of interest–based comparison of rigid and deformable  
469 algorithms. *Radiology.* 2015;274(3):752-763.
- 470 18. Kiser K, Meheissen MAM, Mohamed ASR, et al. Prospective quantitative quality  
471 assurance and deformation estimation of MRI-CT image registration in simulation of head  
472 and neck radiotherapy patients. *Clin Transl Radiat Oncol.* 2019;18:120-127.
- 473 19. Marstal K, Berendsen F, Staring M, Klein S. SimpleElastix: A user-friendly, multi-lingual  
474 library for medical image registration. In: *Proceedings of the IEEE Conference on*  
475 *Computer Vision and Pattern Recognition Workshops.* ; 2016:134-142.
- 476 20. Klein S, Staring M, Murphy K, Viergever MA, Pluim JPW. Elastix: a toolbox for intensity-  
477 based medical image registration. *IEEE Trans Med Imaging.* 2009;29(1):196-205.
- 478 21. Leibfarth S, Mönnich D, Welz S, et al. A strategy for multimodal deformable image  
479 registration to integrate PET/MR into radiotherapy treatment planning. *Acta Oncol (Madr).*  
480 2013;52(7):1353-1359. doi:10.3109/0284186X.2013.813964
- 481 22. Pennec X, Cachier P, Ayache N. Understanding the “demon’s algorithm”: 3D non-rigid  
482 registration by gradient descent. In: *International Conference on Medical Image*  
483 *Computing and Computer-Assisted Intervention.* Springer; 1999:597-605.
- 484 23. Lowekamp B, Chen D, Ibanez L, Blezek D. The Design of SimpleITK . *Front*

- 485 *Neuroinformatics* . 2013;7. <https://www.frontiersin.org/article/10.3389/fninf.2013.00045>
- 486 24. Weistrand O, Svensson S. The ANACONDA algorithm for deformable image registration  
487 in radiotherapy. *Med Phys*. 2015;42(1):40-53. doi:<https://doi.org/10.1118/1.4894702>
- 488 25. Sherer M V, Lin D, Elguindi S, et al. Metrics to evaluate the performance of auto-  
489 segmentation for radiation treatment planning: A critical review. *Radiother Oncol*.  
490 Published online 2021.
- 491 26. Nikolov S, Blackwell S, Zverovitch A, et al. Clinically Applicable Segmentation of Head  
492 and Neck Anatomy for Radiotherapy: Deep Learning Algorithm Development and  
493 Validation Study. *J Med Internet Res*. 2021;23(7):e26151.
- 494 27. Shapiro SS, Wilk MB. An analysis of variance test for normality (complete samples).  
495 *Biometrika*. 1965;52(3/4):591-611.
- 496 28. Wilcoxon F. Individual comparisons by ranking methods. In: *Breakthroughs in Statistics*.  
497 Springer; 1992:196-202.
- 498 29. Van Rossum G, Drake FL. Python 3 Reference Manual. Scotts Valley, CA: CreateSpace;  
499 2009.
- 500 30. Andre JB, Bammer R. Advanced diffusion-weighted magnetic resonance imaging  
501 techniques of the human spinal cord. *Top Magn Reson imaging TMRI*. 2010;21(6):367.
- 502 31. Ou Y, Akbari H, Bilello M, Da X, Davatzikos C. Comparative evaluation of registration  
503 algorithms in different brain databases with varying difficulty: results and insights. *IEEE*  
504 *Trans Med Imaging*. 2014;33(10):2039-2065.
- 505 32. Klein A, Andersson J, Ardekani BA, et al. Evaluation of 14 nonlinear deformation  
506 algorithms applied to human brain MRI registration. *Neuroimage*. 2009;46(3):786-802.



- 507 33. Fabri D, Zambrano V, Bhatia A, et al. A quantitative comparison of the performance of  
508 three deformable registration algorithms in radiotherapy. *Z Med Phys*. 2013;23(4):279-  
509 290.
- 510 34. De Luca M, Giannini V, Vignati A, et al. A fully automatic method to register the prostate  
511 gland on T2-weighted and EPI-DWI images. In: *2011 Annual International Conference of*  
512 *the IEEE Engineering in Medicine and Biology Society*. IEEE; 2011:8029-8032.
- 513 35. Buerger C, Sénégas J, Kabus S, et al. Comparing nonrigid registration techniques for  
514 motion corrected MR prostate diffusion imaging. *Med Phys*. 2015;42(1):69-80.
- 515 36. Eriksson M. Comparison of five methods for deformable, multi-modal image registration  
516 in prostate and pelvic area. Published online 2015.  
517 <https://aaltodoc.aalto.fi/handle/123456789/15209>
- 518 37. Chen DQ, Dell'Acqua F, Rokem A, et al. Diffusion weighted image co-registration:  
519 investigation of best practices. *BioRxiv*. Published online 2019:864108.

520

521

522

523

524

## Appendices

## Appendix A: Additional Metric Evaluations

For each individual structure, in addition to the Dice similarity coefficient (DSC) and the mean surface distance (MSD) as reported in the main text, we also calculated the following evaluation metrics: false-negative DSC (FN-DSC), false-positive DSC (FP-DSC), surface DSC (S-DSC), 95% Hausdorff distance (95% HD), and mean surface distance (MSD). For S-DSC, a tolerance of 2.5 mm was selected as a suitable tolerance from previous studies<sup>1,2</sup>. Boxplot representations are shown in **Figure A1**, while significance test heatmaps are shown in **Figure A2**.

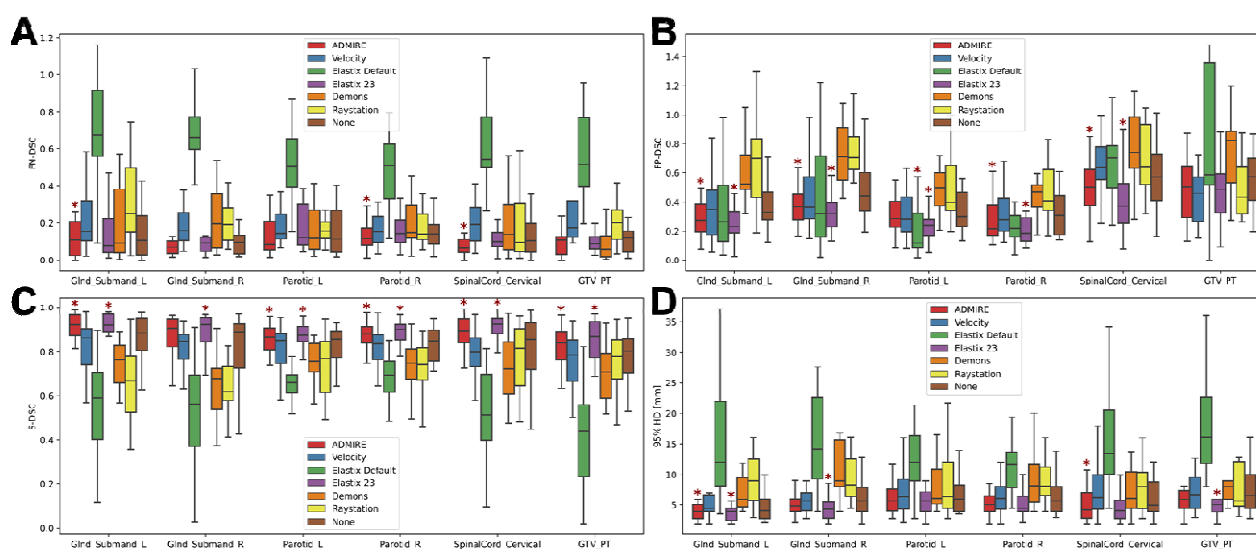

**Figure A1.** Box plots of evaluation metrics for each structure according to the registration method for false negative Dice similarity coefficient (DSC) (FN-DSC) [A], false positive DSC (FP-DSC) [B], surface DSC (S-DSC) [C], and 95% Hausdorff distance (95% HD) [D]. Asterisks indicate a significant improvement between the registration method and no registration (None). GlnD\_Submand, submandibular gland; L, left; R, right; GTV\_PT, primary gross tumor volume.

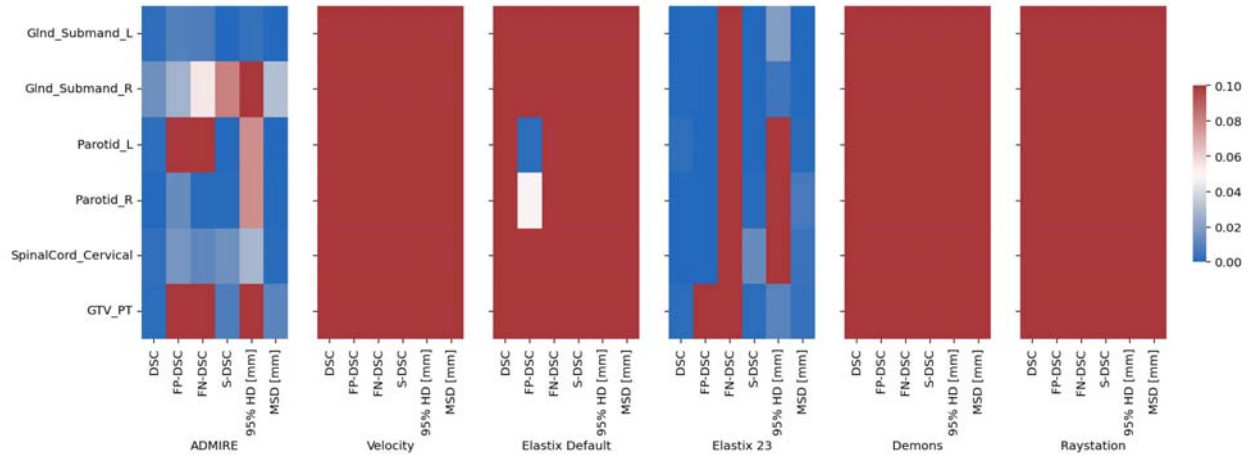

**Figure A2.** Heatmap of Bonferroni corrected p-values for one-way Wilcoxon-signed rank tests between various registration methods and no registration (None) indicating significant improvement across evaluation metrics and structures. Blue colors correspond to significant p-values ( $p < 0.05$ ) while red colors correspond to non-significant values ( $p > 0.05$ ). GlnD\_Submand, submandibular gland; L, left; R, right; GTV\_PT, primary gross tumor volume; DSC, Dice similarity coefficient; MSD, mean surface distance.

## Appendix B: Interobserver Variability Analysis

In a subset of five cases, segmentations for all structures in both sequences were manually generated by three additional separate observers (two physicians and one medical student) for interobserver variability analysis. Segmentations were propagated from T2W to DWI images and then compared to ground truth segmentations generated by each individual observer. For each DIR method, we implemented a Kruskal-Wallis one-way analysis of variance test<sup>3</sup> for all four observers across all structures and evaluation metrics. We performed an interobserver variability analysis to determine if there were any significant differences between observers for a given registration method. Metric value comparisons between all observers were non-significant for all structures (**Figure B1**); therefore, our study had no major interobserver variability.

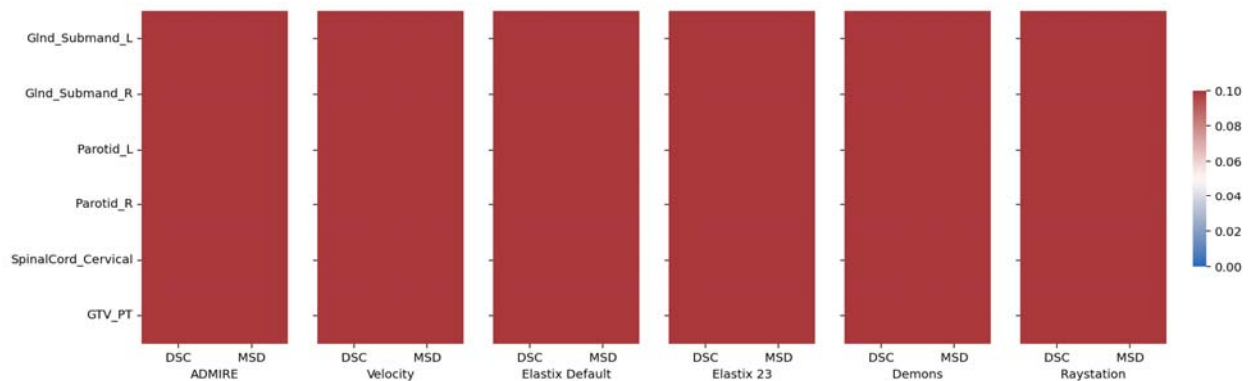

**Figure B1.** Heatmap of Bonferroni corrected p-values for one-way Wilcoxon-signed rank tests between various registration methods and no registration (None) indicating significant improvement across evaluation metrics and structures. Blue colors correspond to significant p-values ( $p < 0.05$ ) while red colors correspond to non-significant values ( $p > 0.05$ ). GInd\_Submand, submandibular gland; L, left; R, right; GTV\_PT, primary gross tumor volume; DSC, Dice similarity coefficient; MSD, mean surface distance.

## Appendix C: Dosimetric Analysis

We performed a series of experiments to determine if DIR algorithms could decrease the dosimetric differences between the propagated contours and ground-truth contours. For each patient, to establish the ground-truth dose for each structure, the dose map corresponding to the radiotherapy planning computed tomography scan was propagated to the T2-weighted (T2W) image using a DIR registration in Velocity AI (v.3.0.1; Varian Medical Systems; Palo Alto, CA, USA), as has been benchmarked in previous studies<sup>4</sup>. The ground-truth T2W structure contours were overlaid on the propagated dose map to determine the ground-truth dose values for each structure. For each DIR algorithm, the T2W dose map was transformed to the space of the DWI image using the corresponding deformable vector field (DVF). The previously propagated contours were then overlaid on the propagated DWI dose map to determine the propagated doses for each structure. The absolute value of the difference between the ground-truth dose and the propagated dose was then calculated for each structure (smaller values were deemed better). One-sided Wilcoxon signed rank tests (alternative hypothesis = less than) with Bonferroni corrections were then used to statistically compare DIR algorithms with no registration (None). Dose differences across all patients for the various structures and DIR algorithms are shown in **Figure C1**. A heatmap of significance values comparing DIR algorithms with None is shown in **Figure C2**.

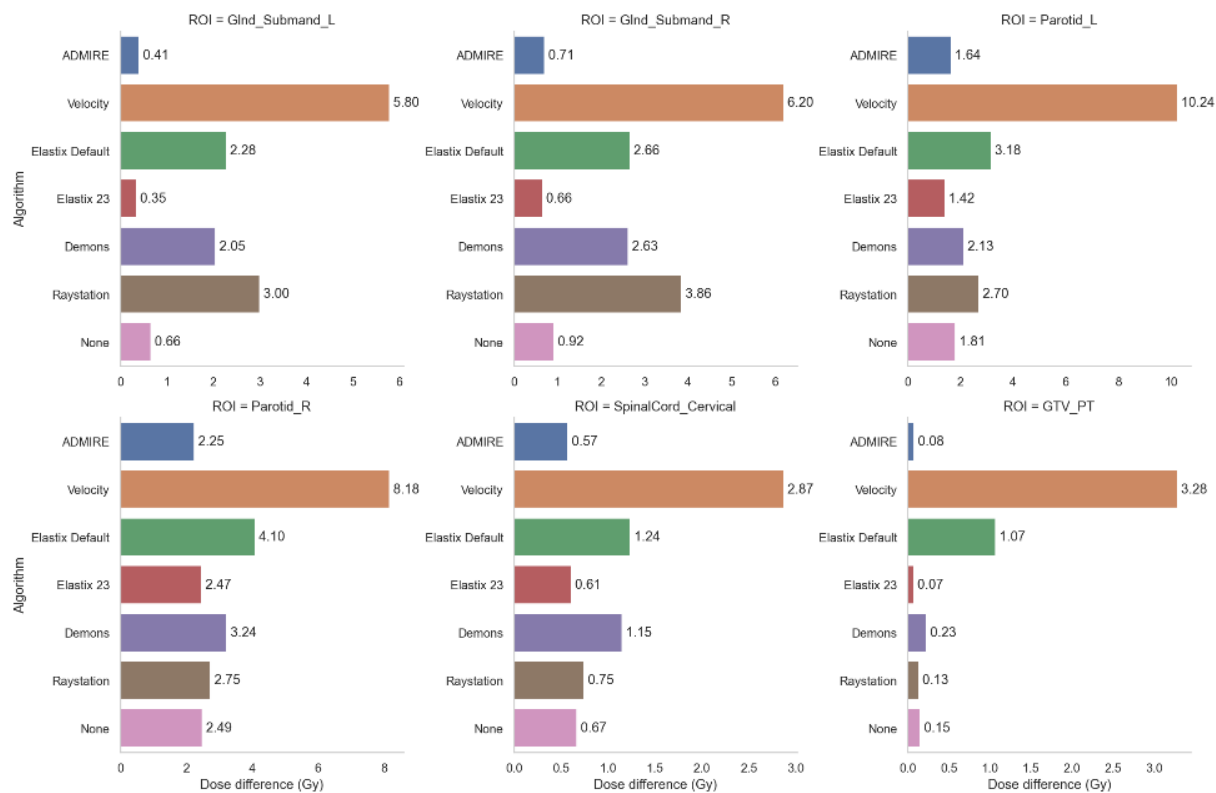

**Figure C1.** Bar plots of dosimetric differences between propagated contours and ground-truth contours based on registration method for all contoured structures. Bar value indicates mean across all patients. GlnD\_Submand, submandibular gland; L, left; R, right; GTV\_PT, primary gross tumor volume.

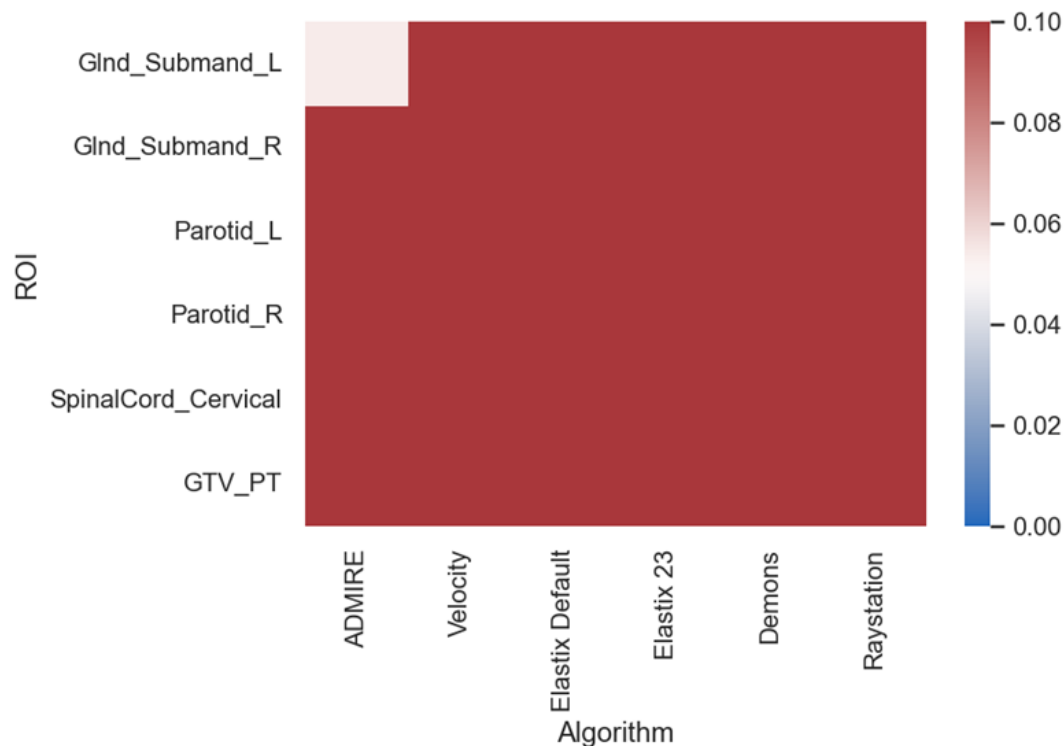

**Figure C2.** Heatmap of Bonferroni corrected p-values for one-way Wilcoxon-signed rank tests between various registration methods and no registration (None). Blue colors correspond to significant p-values ( $p < 0.05$ ) while red colors correspond to non-significant values ( $p > 0.05$ ). GInd\_Submand, submandibular gland; L, left; R, right; GTV\_PT, primary gross tumor volume.

As can be seen, trends for dosimetric differences generally followed trends for geometric evaluation in the main text, i.e., ADMIRE and Elastix 23 tended to provide the best results (lowest difference values), while Velocity, Elastix Default, Demons, and Raystation tended to provide the worst results (highest difference values). However, no DIR algorithm provided statistically lower difference values when compared with None. Importantly, while the dosimetric improvements provided by ADMIRE and Elastix 23 may not be statistically significant, these dosimetric improvements may still be clinically significant. However, further studies, such as those based on normal tissue complication probability models, should be performed to confirm



the clinical impact of these dosimetric differences, and are outside the scope of this study.

Notably, somewhat inconsistent with the findings of the geometric evaluation, Velocity was the algorithm that led to the worst dosimetric results. However, as is reported in previous literature, dosimetric differences do not always correlate with geometric indices<sup>5-7</sup>, so these results are not atypical. The excessive and at times unrealistic warping induced by the Velocity method may have led to these large dosimetric differences.

## Appendix D: Target Registration Error Analysis

To further analyze differences in image registration quality for the various DIR methods, we also performed target registration error (TRE) analysis. 6 main landmarks were identified on both T2 and DWI scans:

1. Horizontal line between the mandible angles.
2. Vertical line between the mentum and the midpoint of the anterior surface of the vertebra.
3. Bilateral medial pterygoid muscle vertical length (right).
4. Horizontal length of the cerebellum.
5. Horizontal line between the outer surface of the parotid glands.
6. Bilateral medial pterygoid muscle vertical length (left).

Landmarks were measured on the original DWI image and deformed T2W images for 3 approaches, ADMIRE, Velocity, and no registration (None) for all 20 patients. We chose to limit the number of DIR methods evaluated due to the large number of measurements needed to test all methods; ADMIRE was chosen as it was amongst the best methods geometrically, while Velocity was amongst the worst. 3D Slicer<sup>8</sup> was used to perform all measurements. The difference between the distances on the original DWI image and the deformed images were then calculated for all structures across all patients. Mann Whitney U tests were used to compare the distributions of ADMIRE and Velocity against None.

4 cases from Velocity showed excessive warping, so these cases excluded from the analysis for all cases. Certain measurements were also not included if a landmark was not visible in a given image. In total, 382 measurements were made across the various methods. The distributions of measurement differences for the various approaches are shown in **Figure D1**. Generally,

median measurements ranged from less than 1 mm to 2.5 mm for most landmarks and approaches. For 5/6 landmarks (1, 2, 3, 5, 6) ADMIRE showed decreased measurement differences compared to None, but differences were not statistically significant.

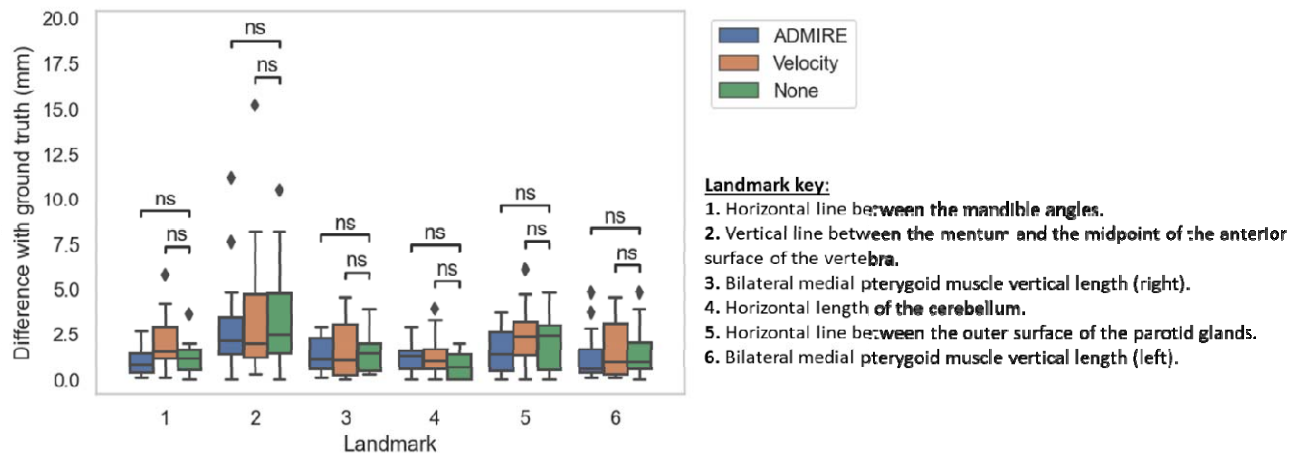

**Figure D1.** Box plots of target registration error measurements using various landmarks for 3 registration approaches (ADMIRE, Velocity, None). ns:  $p > 0.05$  for Mann Whitney u test.

While our TRE results demonstrate some improvements for ADMIRE, unlike our geometric analysis, these results are not statistically significant. Generally, in practice it is difficult to accurately define appropriate corresponding points when registering multimodality data<sup>9</sup>. Moreover, we have previously characterized TRE errors using our standard immobilization device as being less than 2 mm compared to gold-standard CT<sup>10</sup>, so the small differences in deformed images may not have been easily visualized by human observers. Moreover, we believe our geometric analysis, by including surface distance measurements, is able to more robustly capture surface level details analogous to TRE measurements, and should be preferred to evaluate registration quality in this application space.

## Appendix E: Jacobian Determinant Matrix Analysis

We analyzed the Jacobian determinant matrices of the various DIR methods to evaluate the quality of the resultant DVFs. Firstly, for each method, we calculated the percentage of the negative values in the Jacobian determinant matrices (**Figure E1**). A negative Jacobian determinant indicates nonphysical motion and regions of the image folding onto itself (i.e., erroneous physical modeling of the patient)<sup>9</sup>, and should therefore be avoided where possible. Velocity, Elastix Default, and Demons were the only methods with negative values for any patients, with Elastix Default having the highest amount of mean negative values (1.34%). To further investigate Jacobian determinants, we also compared the local volumetric changes based on the Jacobian integral vs. ground-truth volume differences (**Figure E2**). The Jacobian integral was defined as the mean Jacobian minus 1 times the deformed contour volume. The ground-truth volume difference was defined as the deformed contour volume minus the original T2W contour volume. Generally, the Jacobian integral measures the net local volume change, and good agreement between the Jacobian integral and volume changes indicate a reliable DVF<sup>11</sup>. As shown, most algorithms showed reasonable correlation for most structures, with the exception Demons (particularly low value for primary tumor).

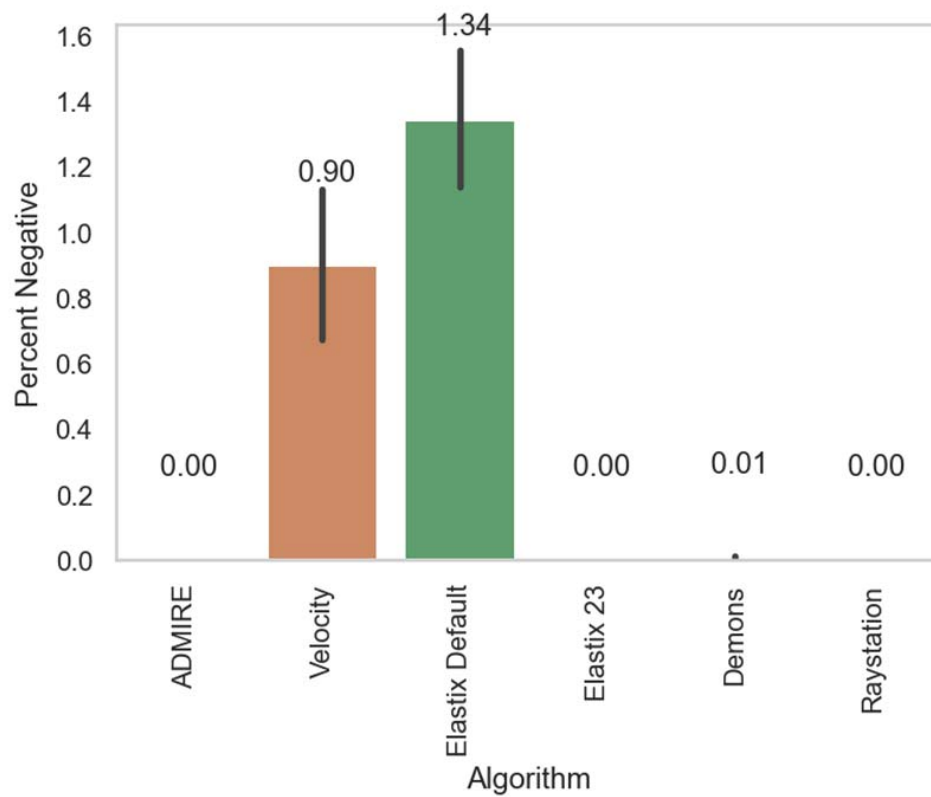

**Figure E1.** Percentage of negative values in Jacobian determinants for each deformable image registration method. Bars represent mean values across all patients (lines indicate 95% confidence interval).

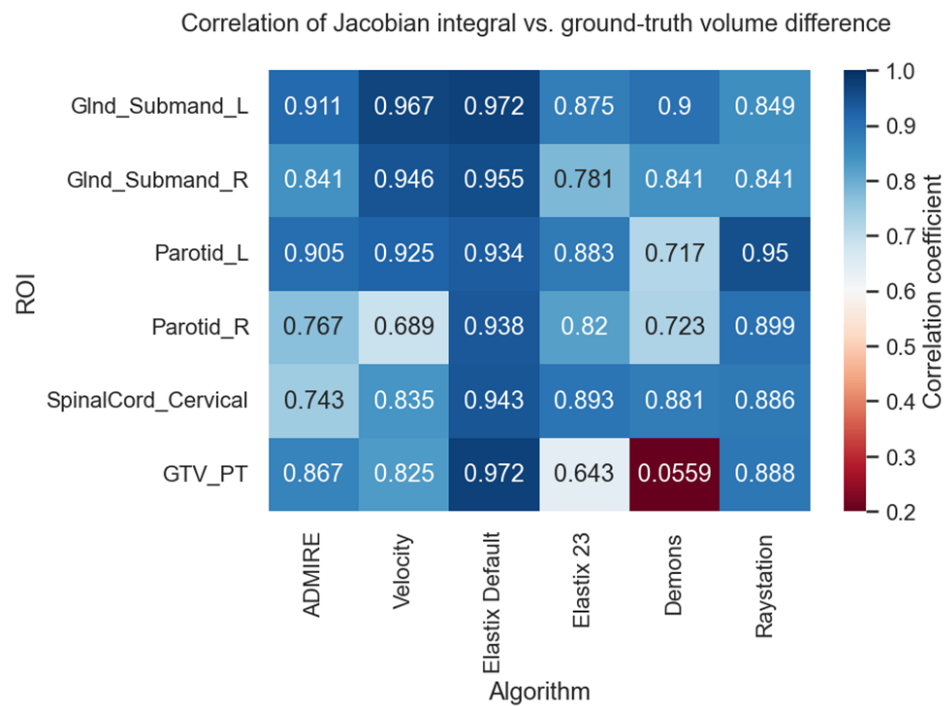

**Figure E2.** Correlation between Jacobian integral and ground-truth volume difference for various deformable image registration methods. GlnD\_Submand, submandibular gland; L, left; R, right; GTV\_PT, primary gross tumor volume.

## Appendix F: Spinal Cord Analysis

Of all the organ at risk (OAR) structures investigated, the cervical spinal cord had the worst overall performance across most geometric metrics, regardless of the algorithm used (**Figure 2 of main text**). Therefore, we further inspected these cases to determine if these propagated segmentations were still clinically acceptable and to determine where algorithms failed to improve overlap with the ground truth. Examples of performance of the best algorithm (ADMIRE) compared to no registration (None) and the corresponding ground truth on the diffusion-weighted image for three cases are shown in **Figure F1**. We categorized the cases as low, medium, and high, corresponding to DSC performance that was below, equal to, and above the mean performance of all cases. For the low DSC performance case, there was a clear advantage to using the ADMIRE method, as more voxels were able to overlap correctly in the superior region of the spinal cord. However, the algorithm had difficulties near the inferior portions of the spinal cord where a greater degree of curvature was present. The differences between the ADMIRE algorithm and None were less dramatic for the medium and high DSC performance cases, where there was minimal curvature in the spinal cord.

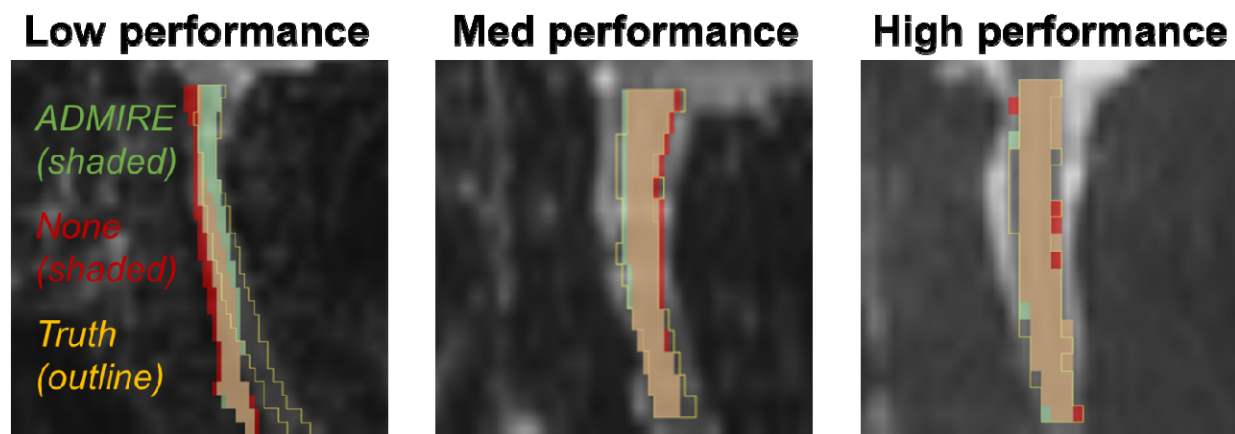

**Figure F1.** Examples of performance of the best algorithm (ADMIRE) compared to no registration (None) and the corresponding ground truth on the diffusion-weighted image for three cases (low, medium, and high DSC performance). The ADMIRE algorithm structure is

shaded in green, None is shaded in red, and the ground truth structure is outlined in yellow. The overlapping areas of the ADMIRE algorithm and None are shaded in tan. DSCs of the ADMIRE algorithm and None were 0.556 and 0.335 (respectively) for the low performance case, 0.752 and 0.718 (respectively) for the medium performance case, and 0.876 and 0.815 (respectively) for the high performance case.



## References

1. Nikolov S, Blackwell S, Zverovitch A, et al. Clinically Applicable Segmentation of Head and Neck Anatomy for Radiotherapy: Deep Learning Algorithm Development and Validation Study. *J Med Internet Res*. 2021;23(7):e26151.
2. Wahid K, Ahmed S, He R, et al. Development of a High-Performance Multiparametric MRI Oropharyngeal Primary Tumor Auto-Segmentation Deep Learning Model and Investigation of Input Channel Effects: Results from a Prospective Imaging Registry. *medRxiv*. Published online 2021.
3. Kruskal WH, Wallis WA. Use of ranks in one-criterion variance analysis. *J Am Stat Assoc*. 1952;47(260):583-621.
4. Kiser K, Meheissen MAM, Mohamed ASR, et al. Prospective quantitative quality assurance and deformation estimation of MRI-CT image registration in simulation of head and neck radiotherapy patients. *Clin Transl Radiat Oncol*. 2019;18:120-127.
5. Sherer M V, Lin D, Elguindi S, et al. Metrics to evaluate the performance of auto-segmentation for radiation treatment planning: A critical review. *Radiother Oncol*. Published online 2021.
6. Kaderka R, Gillespie EF, Mundt RC, et al. Geometric and dosimetric evaluation of atlas based auto-segmentation of cardiac structures in breast cancer patients. *Radiother Oncol*. 2019;131:215-220. doi:<https://doi.org/10.1016/j.radonc.2018.07.013>
7. Voet PWJ, Dirkx MLP, Teguh DN, Hoogeman MS, Levendag PC, Heijmen BJM. Does atlas-based autosegmentation of neck levels require subsequent manual contour editing to avoid risk of severe target underdosage? A dosimetric analysis. *Radiother Oncol*. 2011;98(3):373-377. doi:<https://doi.org/10.1016/j.radonc.2010.11.017>

8. Fedorov A, Beichel R, Kalpathy-Cramer J, et al. 3D Slicer as an image computing platform for the Quantitative Imaging Network. *Magn Reson Imaging*. 2012;30(9):1323-1341.
9. Brock KK, Mutic S, McNutt TR, Li H, Kessler ML. Use of image registration and fusion algorithms and techniques in radiotherapy: Report of the AAPM Radiation Therapy Committee Task Group No. 132. *Med Phys*. 2017;44(7):e43-e76.  
doi:<https://doi.org/10.1002/mp.12256>
10. Mohamed ASR, Hansen C, Weygand J, et al. Prospective analysis of in vivo landmark point-based MRI geometric distortion in head and neck cancer patients scanned in immobilized radiation treatment position: Results of a prospective quality assurance protocol. *Clin Transl Radiat Oncol*. 2017;7:13-19. doi:10.1016/j.ctro.2017.09.003
11. Alam S, Veeraraghavan H, Tringale K, et al. Inter- and intrafraction motion assessment and accumulated dose quantification of upper gastrointestinal organs during magnetic resonance-guided ablative radiation therapy of pancreas patients. *Phys Imaging Radiat Oncol*. 2022;21:54-61. doi:<https://doi.org/10.1016/j.phro.2022.02.007>
